# Supplementary material for: Mutational profiles of marker genes of cervical carcinoma in Bangladeshi patients
Source: PubMed Central journal article supplement (PMC7977314; doi:10.1186/s12885-021-07906-5), 2021-03-18

**Supplementary file 1:** Raw unprocessed gel images of the figures used in Figure 1. PCR products were obtained using **A.** PIK3CA\_1, **B.** PIK3CA\_2, **C.** KRAS\_1, **D.** KRAS\_2, **E.** EGFR primer pairs. 50bp ladder (Bioneer, USA) was used for comparison.

**A.**

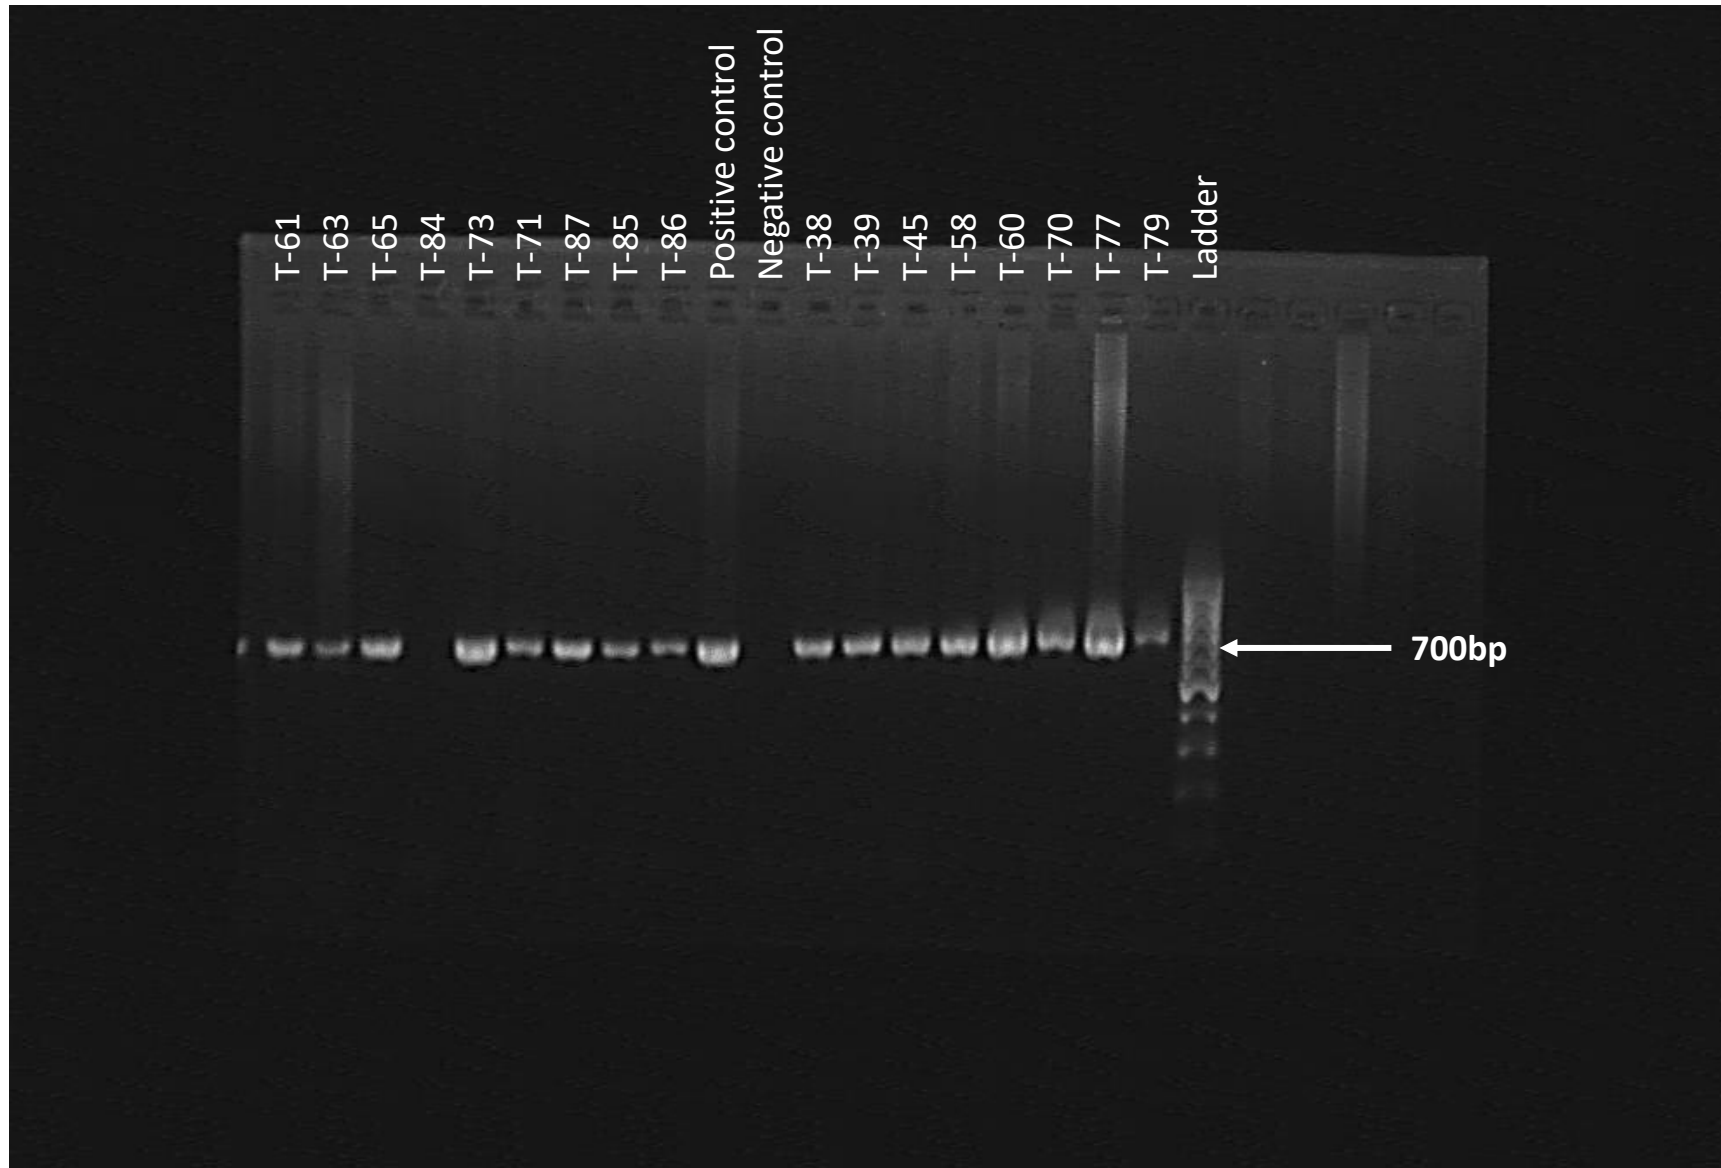

**B.**

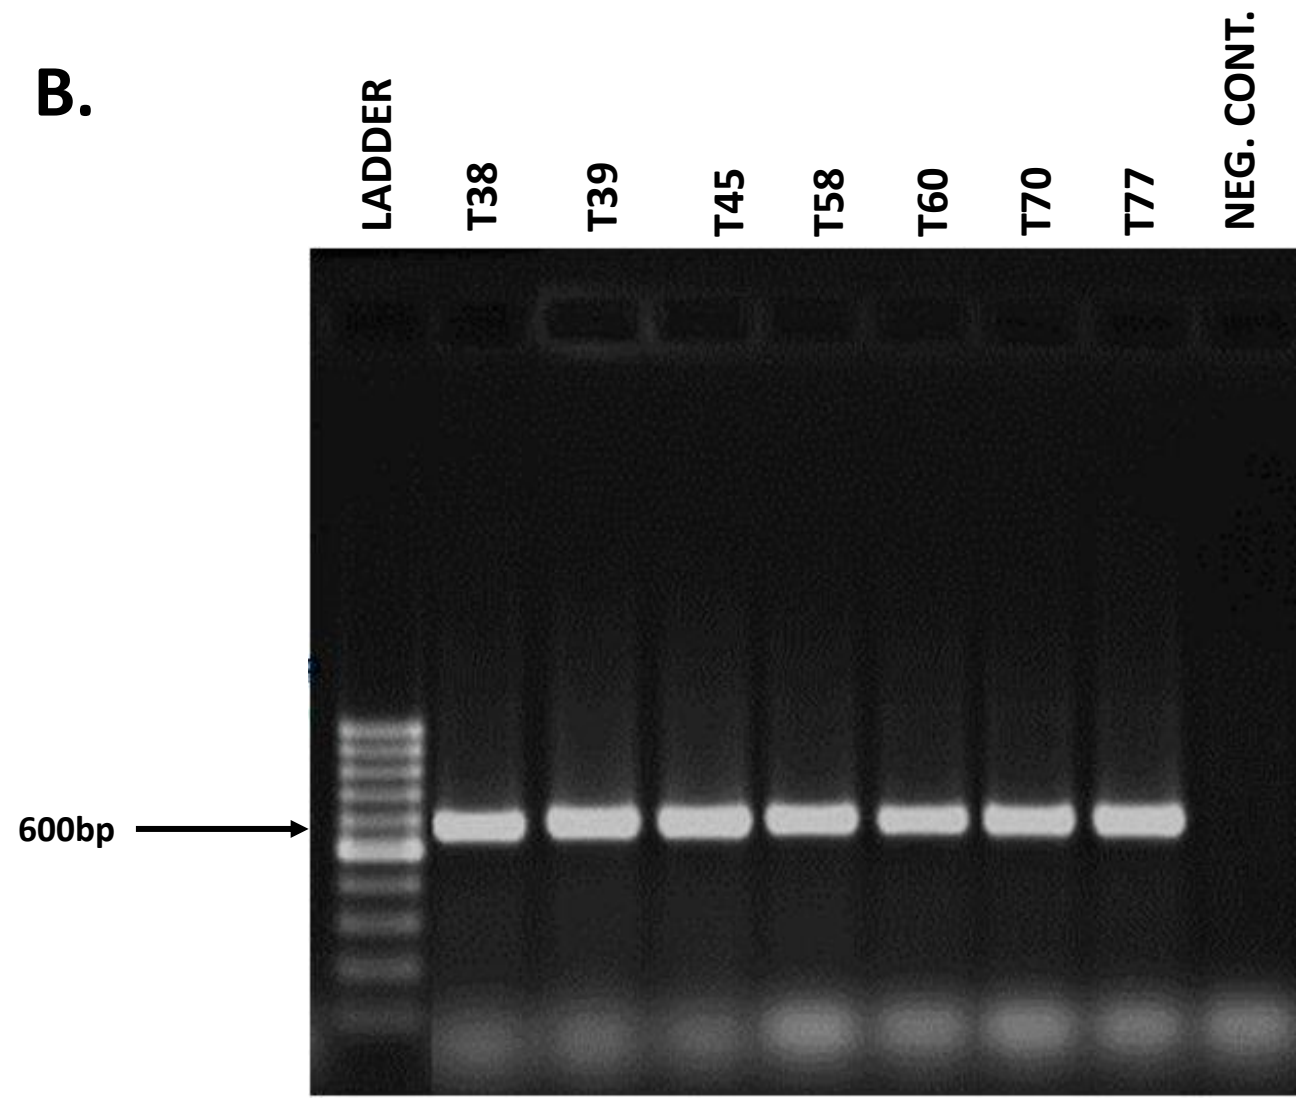

C.

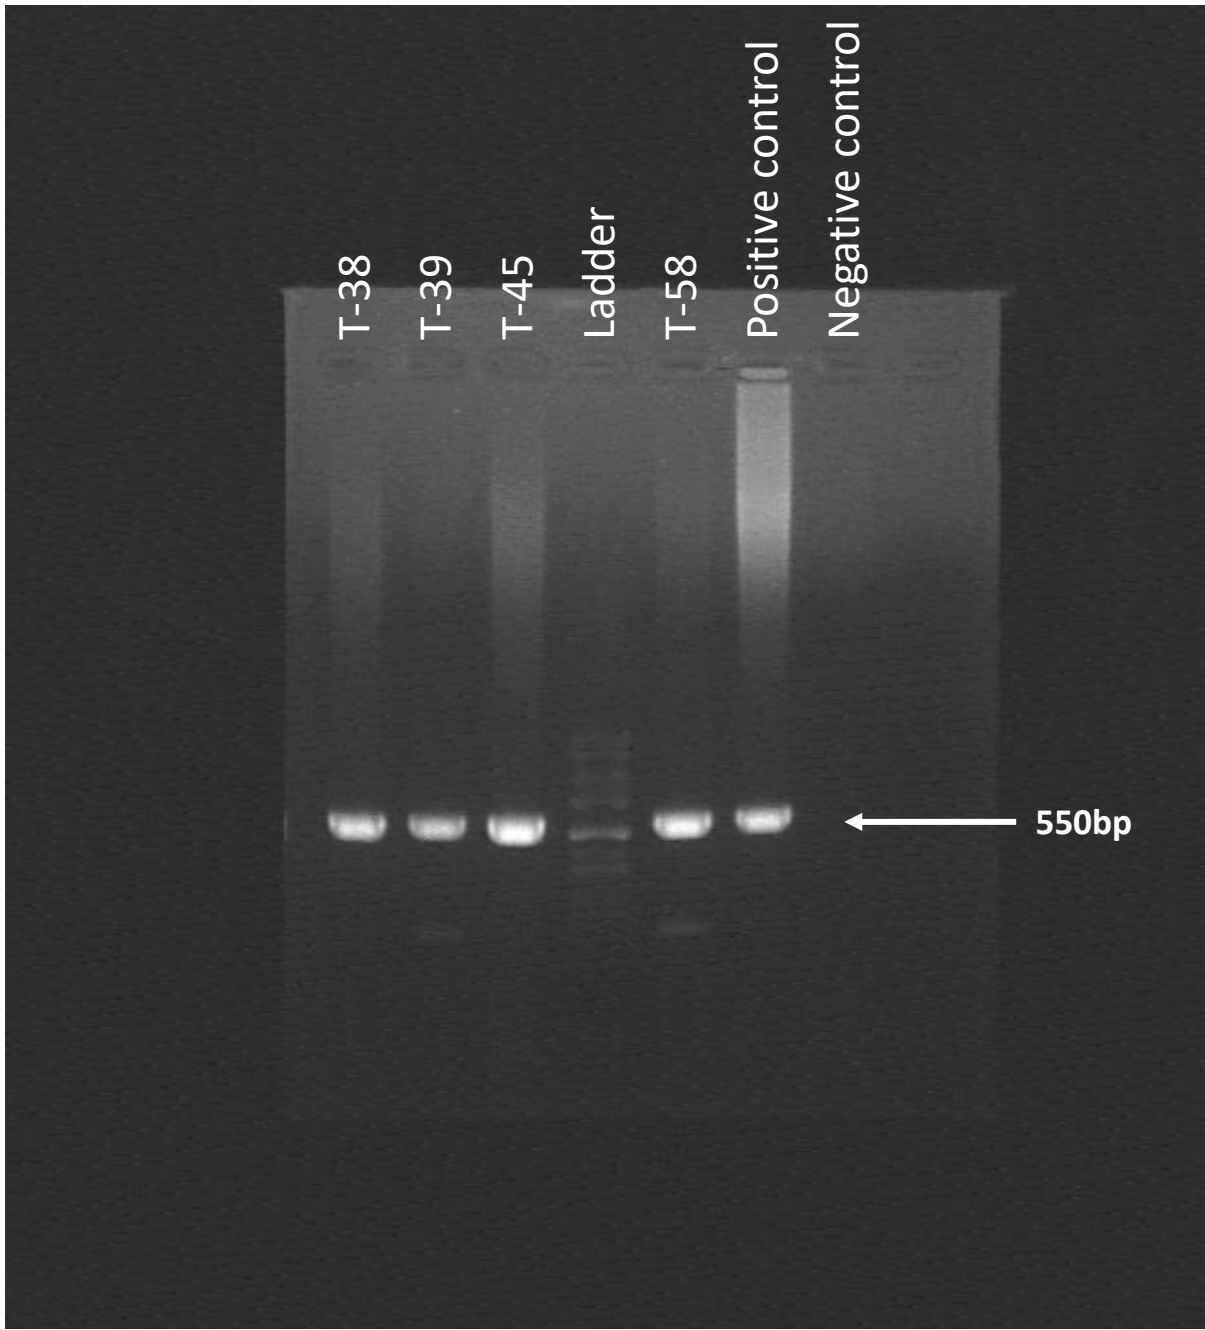

D.

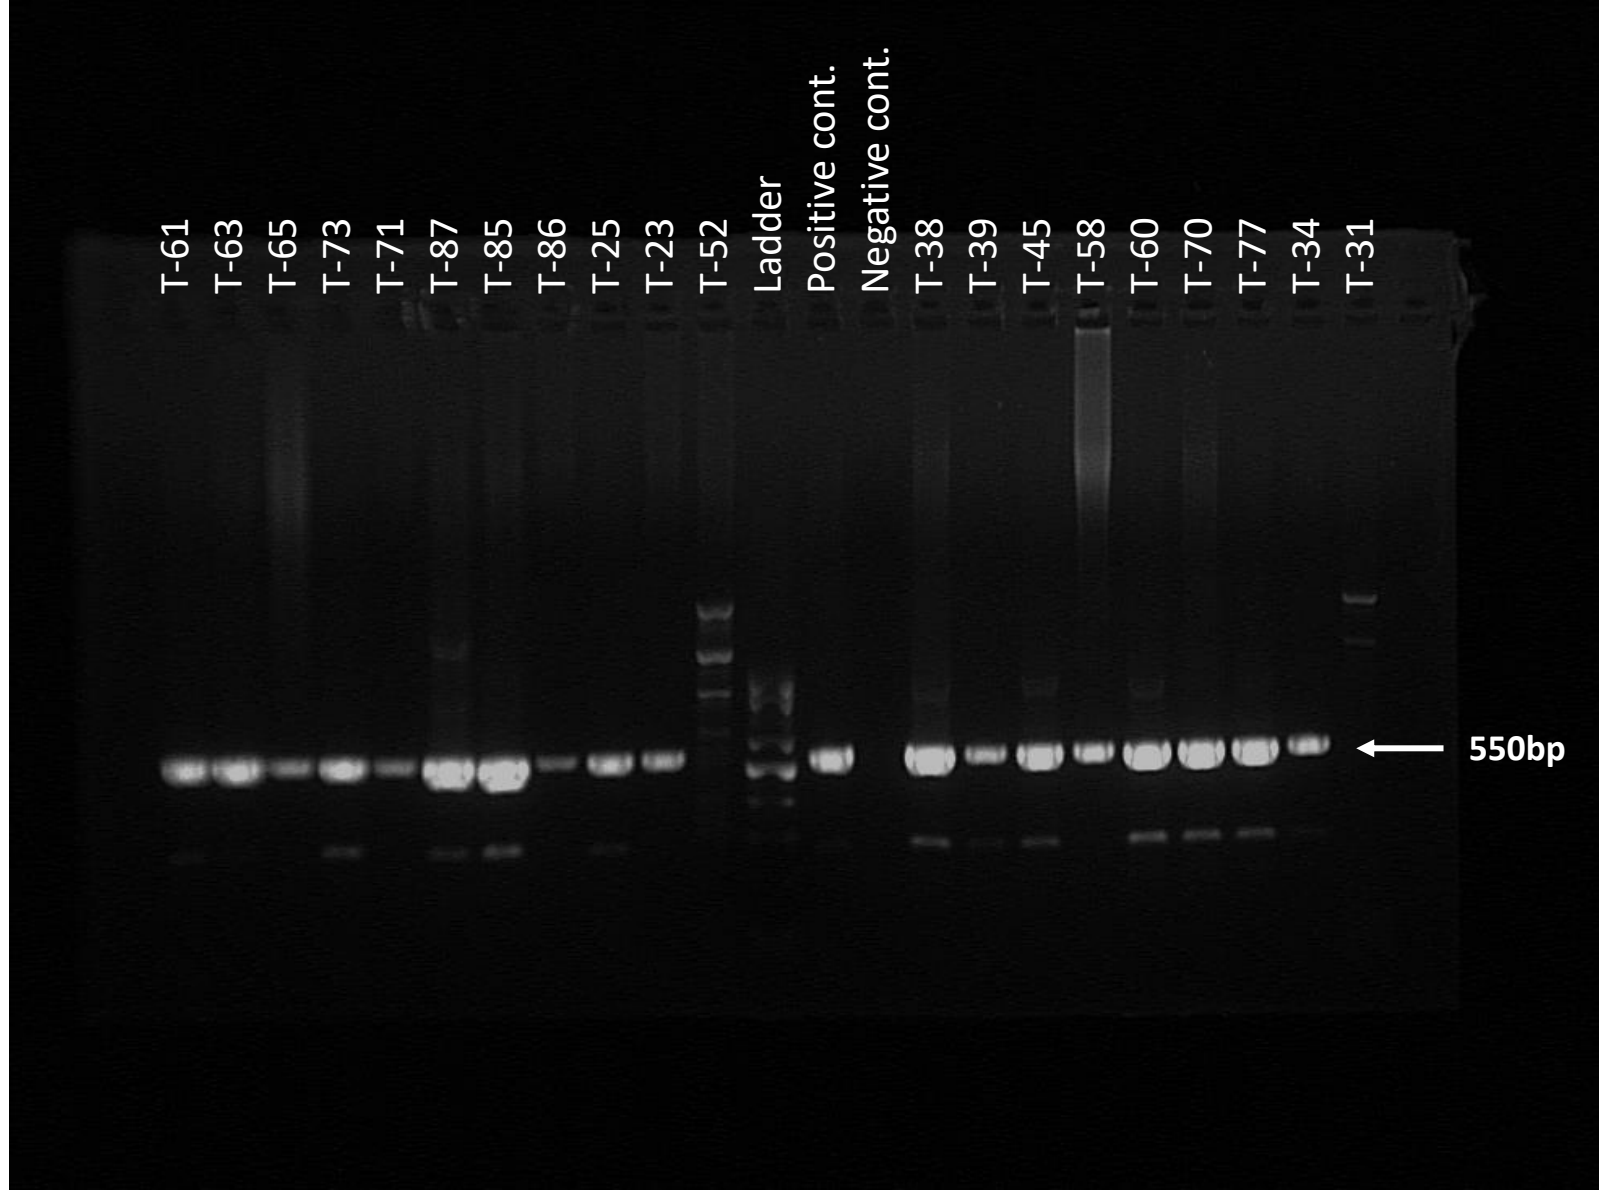

**F.**

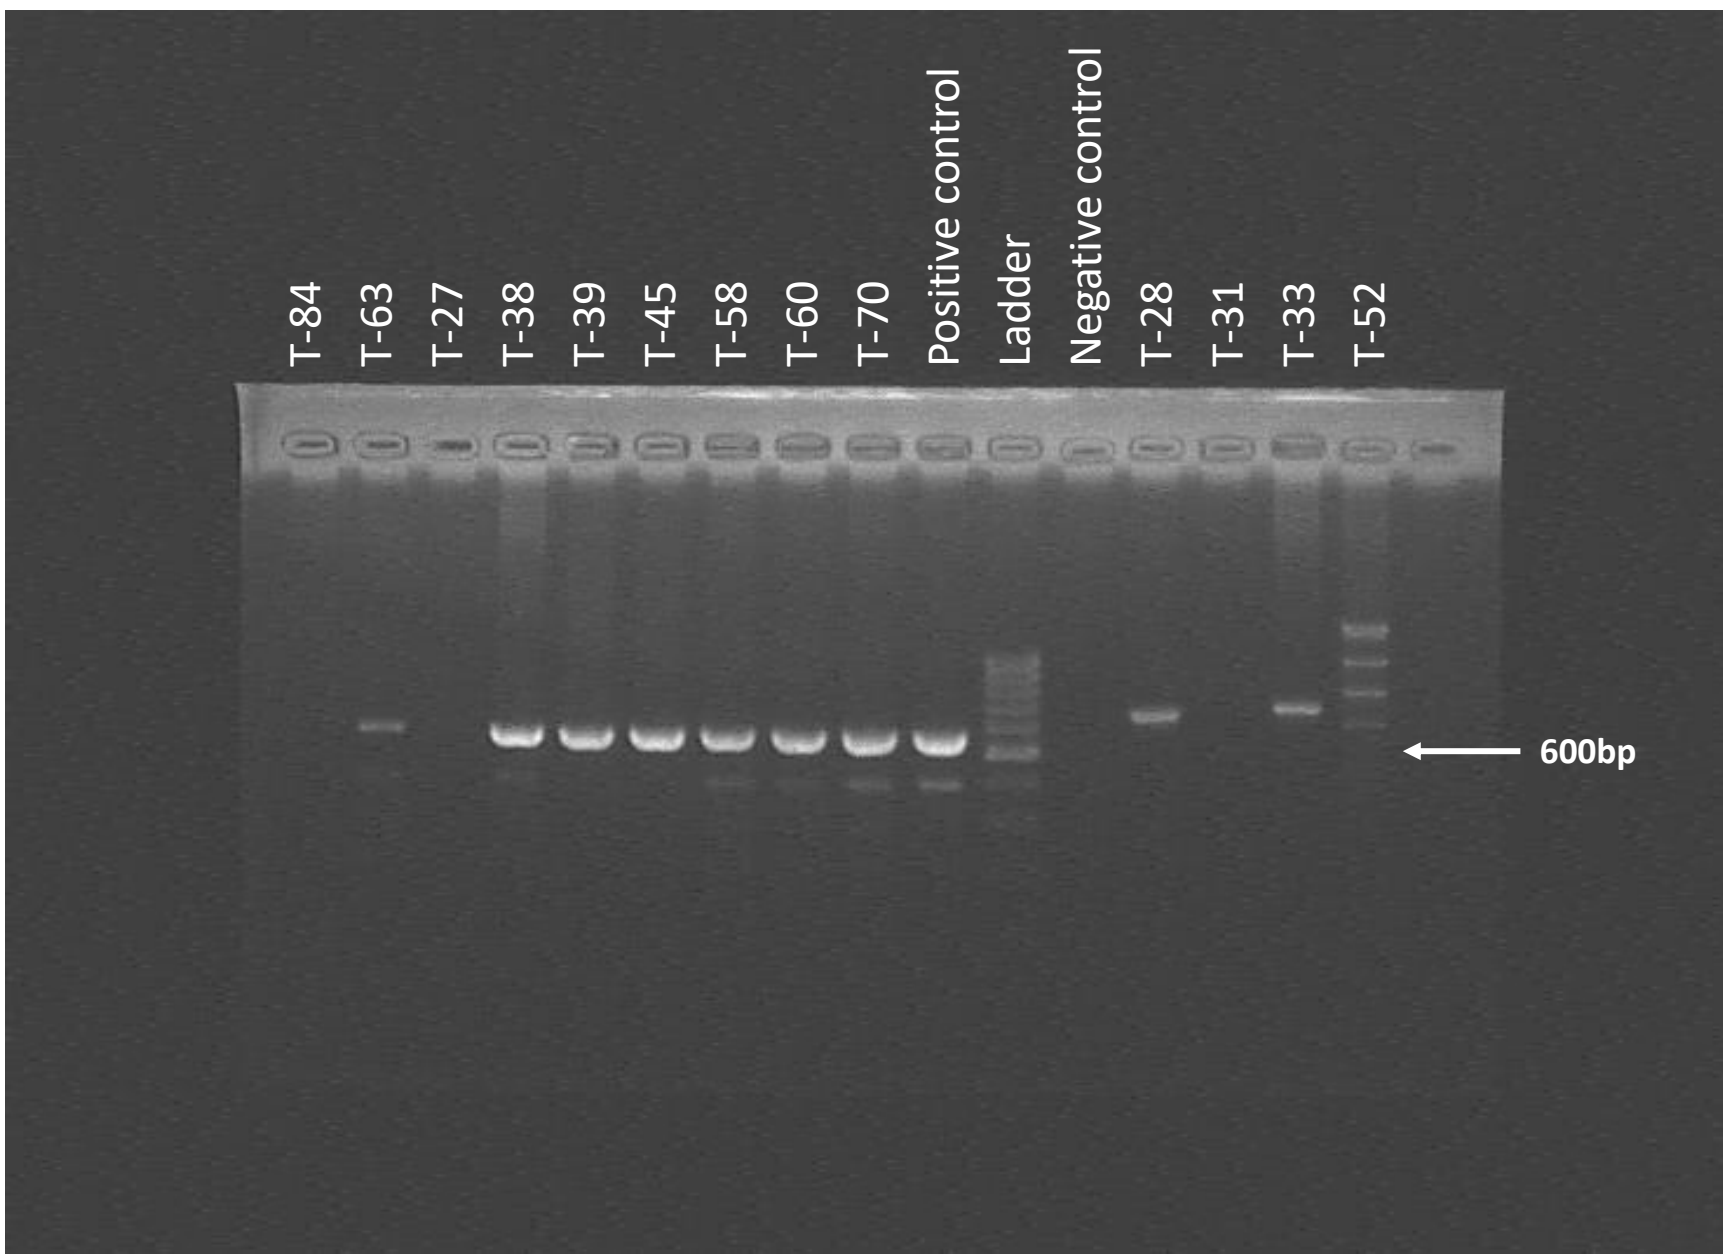

Supplement: 12885_2021_7906_MOESM1_ESM.pdf [file 12885_2021_7906_MOESM1_ESM.pdf]
